# Supplementary material for: Antimicrobial Resistance Pattern of Escherichia coli Isolated from Frozen Chicken Meat in Bangladesh
Source: PubMed Central journal article supplement (PMC7350304; doi:10.3390/pathogens9060420), 2020-05-28
Supplement: pathogens-09-00420-s001.pdf [file pathogens-09-00420-s001.pdf]

**Supplementary Table S1.** Antimicrobial susceptibility pattern of ESBL-Ec and Non-ESBL-Ec isolated from frozen chicken meat.

| Antimicrobial category                                                       | No. of isolates (%) |           |           |                        |           |           |                        |          |           |
|------------------------------------------------------------------------------|---------------------|-----------|-----------|------------------------|-----------|-----------|------------------------|----------|-----------|
|                                                                              | Overall (n = 86)    |           |           | ESBL-Ec (n = 74)       |           |           | Non-ESBL-Ec (n = 12)   |          |           |
|                                                                              | R                   | I         | S         | R                      | I         | S         | R                      | I        | S         |
| <b>Fluoroquinolones</b>                                                      |                     |           |           |                        |           |           |                        |          |           |
| Ciprofloxacin                                                                | 38 (44.2)           | 20 (23.3) | 28 (32.6) | 35 (47.3) <sup>a</sup> | 17 (23.0) | 22 (29.7) | 3 (25.0) <sup>b</sup>  | 3 (25.0) | 6 (50.0)  |
| Nalidixic acid                                                               | 53 (61.6)           | 15 (17.4) | 18 (20.9) | 46 (62.2) <sup>a</sup> | 14 (18.9) | 14 (18.9) | 7 (58.3) <sup>a</sup>  | 1 (8.3)  | 4 (33.3)  |
| Levofloxacin                                                                 | 29 (33.7)           | 21 (24.4) | 36 (41.9) | 27 (36.5) <sup>a</sup> | 17 (23.0) | 30 (40.5) | 2 (16.7) <sup>b</sup>  | 4 (33.3) | 6 (50.0)  |
| Norfloxacin                                                                  | 37 (43.0)           | 11 (12.8) | 38 (44.2) | 33 (44.6) <sup>a</sup> | 9 (12.2)  | 32 (43.2) | 4 (33.3) <sup>a</sup>  | 2 (16.7) | 6 (50.0)  |
| Gatifloxacin                                                                 | 43 (50.0)           | 14 (16.3) | 29 (33.7) | 38 (51.4) <sup>a</sup> | 11 (14.9) | 25 (33.8) | 5 (41.7) <sup>a</sup>  | 3 (25.0) | 4 (33.3)  |
| Pefloxacin                                                                   | 76 (88.4)           | 0         | 10 (11.6) | 65 (87.8) <sup>a</sup> | 0         | 9 (12.2)  | 11 (91.7) <sup>a</sup> | 0        | 1 (8.3)   |
| Ofloxacin                                                                    | 49 (57.0)           | 9 (10.5)  | 28 (32.6) | 43 (58.1) <sup>a</sup> | 9 (12.2)  | 22 (29.7) | 6 (50.0) <sup>a</sup>  | 0        | 6 (50.0)  |
| <b>Non-extended spectrum cephalosporins</b>                                  |                     |           |           |                        |           |           |                        |          |           |
| <b>1<sup>st</sup> generation</b>                                             |                     |           |           |                        |           |           |                        |          |           |
| Cefalexin                                                                    | 40 (46.5)           | 0         | 46 (53.5) | 39 (52.7) <sup>a</sup> | 0         | 35 (47.3) | 1 (8.3) <sup>b</sup>   | 0        | 11 (91.7) |
| Cephradine                                                                   | 43 (50.0)           | 0         | 43 (50.0) | 41 (55.4) <sup>a</sup> | 0         | 33 (44.6) | 2 (16.7) <sup>b</sup>  | 0        | 10 (83.3) |
| <b>2<sup>nd</sup> generation</b>                                             |                     |           |           |                        |           |           |                        |          |           |
| Cefuroxime                                                                   | 37 (43.0)           | 4 (4.7)   | 45 (52.3) | 36 (48.6) <sup>a</sup> | 4 (5.4)   | 34 (45.9) | 1 (8.3) <sup>a</sup>   | 0        | 11 (91.7) |
| Cefaclor                                                                     | 13 (15.1)           | 38 (44.2) | 35 (40.7) | 12 (16.2) <sup>a</sup> | 31 (41.9) | 31 (41.9) | 1 (8.3) <sup>a</sup>   | 7 (58.3) | 4 (33.3)  |
| <b>Extended-spectrum cephalosporins</b>                                      |                     |           |           |                        |           |           |                        |          |           |
| <b>3<sup>rd</sup> generation</b>                                             |                     |           |           |                        |           |           |                        |          |           |
| Cefixime                                                                     | 0                   | 4 (4.7)   | 82 (95.3) | 0                      | 2 (2.7)   | 72 (97.3) | 0                      | 2 (16.7) | 10 (83.3) |
| Ceftazidime                                                                  | 25 (29.1)           | 3 (3.5)   | 58 (67.4) | 25 (33.8)              | 3 (4.1)   | 46 (62.2) | 0                      | 0        | 12 (100)  |
| Ceftriaxone                                                                  | 2 (2.3)             | 9 (10.5)  | 75 (87.2) | 2 (2.7)                | 9 (12.2)  | 63 (85.1) | 0                      | 0        | 12 (100)  |
| Cefotaxime                                                                   | 46 (53.5)           | 12 (14.0) | 28 (32.6) | 46 (62.2)              | 12 (16.2) | 16 (21.6) | 0                      | 0        | 12 (100)  |
| <b>4<sup>th</sup> generation</b>                                             |                     |           |           |                        |           |           |                        |          |           |
| Cefepime                                                                     | 62 (72.1)           | 13 (15.1) | 11 (12.8) | 60 (81.1) <sup>a</sup> | 10 (13.5) | 4 (5.4)   | 2 (16.7) <sup>b</sup>  | 3 (25.0) | 7 (58.3)  |
| <b>Cephamycins</b>                                                           |                     |           |           |                        |           |           |                        |          |           |
| Cefoxitin                                                                    | 42 (48.8)           | 8 (9.3)   | 36 (41.9) | 41 (55.4) <sup>a</sup> | 7 (9.5)   | 26 (35.1) | 1 (8.3) <sup>a</sup>   | 1 (8.3)  | 10 (83.3) |
| <b>Penicillins</b>                                                           |                     |           |           |                        |           |           |                        |          |           |
| Ampicillin                                                                   | 77 (89.5)           | 5 (5.8)   | 4 (4.7)   | 66 (89.2) <sup>a</sup> | 5 (6.8)   | 3 (4.1)   | 11 (91.7) <sup>a</sup> | 0        | 1 (8.3)   |
| Amoxicillin                                                                  | 79 (91.9)           | 0         | 7 (8.1)   | 68 (91.9) <sup>a</sup> | 0         | 6 (8.1)   | 11 (91.7) <sup>a</sup> | 0        | 1 (8.3)   |
| <b>Penicillins + <math>\beta</math>-lactamase inhibitors</b>                 |                     |           |           |                        |           |           |                        |          |           |
| Amoxicillin-clavulanic acid                                                  | 36 (41.9)           | 28 (32.6) | 22 (25.6) | 31 (41.9) <sup>a</sup> | 25 (33.8) | 18 (24.3) | 5 (41.7) <sup>a</sup>  | 3 (25.0) | 4 (33.3)  |
| <b>Antipseudomonal penicillins + <math>\beta</math>-lactamase inhibitors</b> |                     |           |           |                        |           |           |                        |          |           |
| Piperacillin-tazobactam                                                      | 61 (70.9)           | 23 (26.7) | 2 (2.3)   | 54 (73.0) <sup>a</sup> | 18 (24.3) | 2 (2.7)   | 7 (58.3) <sup>a</sup>  | 5 (41.7) | 0         |
| <b>Carbapenems</b>                                                           |                     |           |           |                        |           |           |                        |          |           |

|                                  |           |           |           |                           |           |           |                            |          |           |
|----------------------------------|-----------|-----------|-----------|---------------------------|-----------|-----------|----------------------------|----------|-----------|
| Imipenem                         | 41 (47.7) | 19 (22.1) | 26 (30.2) | 40<br>(54.1) <sup>a</sup> | 15 (20.3) | 19 (25.7) | 1 (8.3) <sup>b</sup>       | 4 (33.3) | 7 (58.3)  |
| Meropenem                        | 36 (41.9) | 14 (16.3) | 36 (41.9) | 36 (48.6)                 | 13 (17.6) | 25 (33.8) | 0                          | 1 (8.3)  | 11 (91.7) |
| <b>Polymyxins</b>                |           |           |           |                           |           |           |                            |          |           |
| Colistin                         | 9 (10.5)  | 0         | 77 (89.5) | 9 (12.2)                  | 0         | 65 (87.8) | 0                          | 0        | 12 (100)  |
| Polymyxin B                      | 6 (7.0)   | 0         | 80 (93.0) | 6 (8.1)                   | 0         | 68 (91.9) | 0                          | 0        | 12 (100)  |
| <b>Monobactams</b>               |           |           |           |                           |           |           |                            |          |           |
| Aztreonam                        | 1 (1.2)   | 5 (5.8)   | 80 (93.0) | 1 (1.4)                   | 5 (6.8)   | 68 (91.9) | 0                          | 0        | 12 (100)  |
| <b>Aminoglycosides</b>           |           |           |           |                           |           |           |                            |          |           |
| Gentamicin                       | 7 (8.1)   | 7 (8.1)   | 72 (83.7) | 6 (8.1) <sup>a</sup>      | 6 (8.1)   | 62 (83.8) | 1 (8.3) <sup>a</sup>       | 1 (8.3)  | 10 (83.3) |
| Tobramycin                       | 7 (8.1)   | 13 (15.1) | 66 (76.7) | 5 (6.8) <sup>a</sup>      | 13 (17.6) | 56 (75.7) | 2 (16.7) <sup>b</sup>      | 0        | 10 (83.3) |
| Amikacin                         | 15 (17.4) | 43 (50.0) | 28 (32.6) | 14<br>(18.9) <sup>a</sup> | 38 (51.4) | 22 (29.7) | 1 (8.3) <sup>b</sup>       | 5 (41.7) | 6 (50.0)  |
| Streptomycin                     | 50 (58.1) | 17 (19.8) | 19 (22.1) | 47<br>(63.5) <sup>a</sup> | 17 (23.0) | 10 (13.5) | 3 (25.0) <sup>b</sup>      | 0        | 9 (75.0)  |
| Neomycin                         | 24 (27.9) | 41 (47.7) | 21 (24.4) | 22<br>(29.7) <sup>a</sup> | 39 (52.7) | 13 (17.6) | 2 (16.7) <sup>a</sup>      | 2 (16.7) | 8 (66.7)  |
| <b>Tetracyclines</b>             |           |           |           |                           |           |           |                            |          |           |
| Tetracycline                     | 73 (84.9) | 5 (5.8)   | 8 (9.3)   | 62<br>(83.8) <sup>a</sup> | 5 (6.8)   | 7 (9.5)   | 11<br>(91.7) <sup>a</sup>  | 0        | 1 (8.3)   |
| Oxytetracycline                  | 80 (93.0) | 0         | 6 (7.0)   | 68<br>(91.9) <sup>a</sup> | 0         | 6 (8.1)   | 12<br>(100.0) <sup>a</sup> | 0        | 0         |
| Doxycycline                      | 59 (68.6) | 20 (23.3) | 7 (8.1)   | 52<br>(70.3) <sup>a</sup> | 16 (21.6) | 6 (8.1)   | 7 (58.3) <sup>a</sup>      | 4 (33.3) | 1 (8.3)   |
| <b>Folate pathway inhibitors</b> |           |           |           |                           |           |           |                            |          |           |
| Trimethoprim-sulphamethoxazole   | 76 (88.4) | 0         | 10 (11.6) | 66<br>(89.2) <sup>a</sup> | 0         | 8 (10.8)  | 10<br>(83.3) <sup>a</sup>  | 0        | 2 (16.7)  |
| <b>Glycylcyclines</b>            |           |           |           |                           |           |           |                            |          |           |
| Tigecycline                      | 2 (2.3)   | 15 (17.4) | 69 (80.2) | 1 (1.4) <sup>a</sup>      | 13 (17.6) | 60 (81.1) | 1 (8.3) <sup>b</sup>       | 2 (16.7) | 9 (75.0)  |
| <b>Phenicolos</b>                |           |           |           |                           |           |           |                            |          |           |
| Chloramphenicol                  | 27 (31.4) | 0         | 59 (68.6) | 21<br>(28.4) <sup>a</sup> | 0         | 53 (71.6) | 6 (50.0) <sup>b</sup>      | 0        | 6 (50.0)  |
| <b>Macrolids</b>                 |           |           |           |                           |           |           |                            |          |           |
| Azithromycin                     | 30 (34.9) | 0         | 56 (65.1) | 29<br>(39.2) <sup>a</sup> | 0         | 45 (60.8) | 1 (8.3) <sup>b</sup>       | 0        | 11 (91.7) |

n = number of isolates, R = Resistant, I = Intermediate, S = Susceptible; ESBL-Ec = ESBL-producing *E. coli*; Non-ESBL-Ec = ESBL- non producing *E. coli*; <sup>a,b</sup>Values in the same row with different superscripts differ significantly (p < 0.05).
